# Supplementary material
Source: MDPI journal article supplement (https://www.mdpi.com/2073-4433/14/4/609)
Supplement: s1 [file s1]

Article

# Ozone Formation at a Suburban Site in the Pearl River Delta Region, China: Role of Biogenic Volatile Organic Compounds

Jun Wang<sup>1,2,3</sup>, Yanli Zhang<sup>1,2,4,\*</sup>, Shaoxuan Xiao<sup>1,2,3</sup>, Zhenfeng Wu<sup>1,2,3</sup> and Xinming Wang<sup>1,2,3,4,\*</sup>

<sup>1</sup> State Key Laboratory of Organic Geochemistry, Guangdong Key Laboratory of Environmental Protection and Resources Utilization, Guangzhou Institute of Geochemistry, Chinese Academy of Sciences, Guangzhou 510640, China; wangjun@gig.ac.cn (J.W.); xiaoshaoxuan@gig.ac.cn (S.X.); wuzhenfeng@gig.ac.cn (Z.W.)

<sup>2</sup> CAS Center for Excellence in Deep Earth Science, Guangzhou 510640, China

<sup>3</sup> University of Chinese Academy of Sciences, Beijing 100049, China

<sup>4</sup> Center for Excellence in Regional Atmospheric Environment, Institute of Urban Environment, Chinese Academy of Sciences, Xiamen 361021, China

\* Correspondence: zhang\_yl86@gig.ac.cn (Y.Z.); wangxm@gig.ac.cn (X.W.)

**Table S1.** The average mixing ratios and 95% confidence intervals (95% C.I.) of TVOCs (pptv) measured during the four periods.

| Species                | MDL | P1          | P2          | P3          | NP             |
|------------------------|-----|-------------|-------------|-------------|----------------|
|                        |     | Mean        | Mean        | Mean        | Mean           |
|                        |     | (95 %)      | (95 %)      | (95 %)      | (95 %)         |
| Alkanes                |     |             |             |             |                |
| Ethane                 | 39  | 1573 (494)  | 1299 (194)  | 1653 (143)  | 1517 (188)     |
| Propane                | 31  | 4854 (2722) | 3134 (2165) | 3620 (1657) | 3663<br>(1320) |
| i-Butane               | 14  | 2667 (2702) | 3399 (2643) | 3537 (2841) | 2105<br>(1391) |
| n-Butane               | 21  | 5039 (5113) | 4574 (3697) | 5153 (4523) | 3826<br>(2719) |
| i-Pentane              | 12  | 1248 (841)  | 551 (357)   | 703 (351)   | 1180 (616)     |
| n-Pentane              | 8   | 690 (710)   | 209 (112)   | 272 (128)   | 517 (286)      |
| 2,2-Dimethylbutane     | 3   | 40 (19)     | 19 (11)     | 22 (9)      | 38 (18)        |
| Cyclopentane           | 8   | 228 (155)   | 133 (42)    | 314 (62)    | 282 (100)      |
| 2,3-Dimethylbutane     | 9   | 131 (162)   | 59 (37)     | 119 (53)    | 148 (139)      |
| 2-Methylpentane        | 8   | 510 (265)   | 198 (142)   | 161 (75)    | 487 (269)      |
| n-Hexane               | 8   | 296 (172)   | 183 (100)   | 270 (254)   | 375 (206)      |
| Methylcyclopentane     | 7   | 80 (44)     | 50 (34)     | 56 (25)     | 84 (41)        |
| 2,4-Dimethylpentane    | 1   | 41 (28)     | 8 (3)       | 21 (8)      | 30 (15)        |
| Cyclohexane            | 1   | 69 (41)     | 38 (31)     | 42 (19)     | 62 (27)        |
| 2-Methylhexane         | 7   | 120 (87)    | 79 (75)     | 87 (50)     | 100 (52)       |
| 2,3-Dimethylpentane    | 4   | 261 (264)   | 43 (36)     | 330 (301)   | 168 (82)       |
| 3-Methylhexane         | 9   | 40 (23)     | 279 (96)    | 333 (101)   | 53 (38)        |
| 2,2,4-Trimethylpentane | 4   | 153 (118)   | 55 (42)     | 57 (27)     | 96 (58)        |
| n-Heptane              | 6   | 153 (147)   | 89 (62)     | 88 (50)     | 129 (69)       |
| Methylcyclohexane      | 1   | 84 (65)     | 47 (49)     | 57 (30)     | 58 (33)        |
| 2,3,4-Trimethylpentane | 2   | 13 (12)     | 11 (5)      | 9 (4)       | 15 (6)         |
| 2-Methylheptane        | 8   | 26 (26)     | 18 (14)     | 17 (12)     | 60 (42)        |
| 3-Methylheptane        | 12  | 24 (18)     | 16 (11)     | 18 (8)      | 60 (42)        |
| n-Octane               | 6   | 44 (35)     | 24 (9)      | 27 (11)     | 29 (12)        |
| n-Nonane               | 6   | 19 (9)      | 20 (7)      | 30 (23)     | 16 (3)         |
| n-Decane               | 6   | 93 (83)     | 44 (22)     | 43 (34)     | 58 (27)        |
| n-Undecane             | 6   | 93 (128)    | 9 (0)       | 210 (112)   | 16 (4)         |
| n-Dodecane             | 6   | 17 (10)     | BDL         | 14 (4)      | BDL            |
| Alkenes                |     |             |             |             |                |
| Ethene                 | 35  | 564 (290)   | 564 (155)   | 487 (105)   | 607 (130)      |
| Propene                | 41  | 390 (129)   | 285 (99)    | 307 (92)    | 431 (161)      |
| 1-Butene               | 4   | 153 (80)    | 87 (27)     | 128 (72)    | 129 (65)       |

|                        |    |             |             |            |            |
|------------------------|----|-------------|-------------|------------|------------|
| 1,3-Butadiene          | 7  | 36 (20)     | 75 (61)     | 87 (61)    | 48 (29)    |
| Trans-2-Butene         | 5  | 51 (64)     | 72 (61)     | 107 (88)   | 46 (49)    |
| Cis-2-Butene           | 8  | 159 (13)    | 29 (20)     | 48 (39)    | 28 (13)    |
| 3-Methyl-1-butene      | 2  | 7 (5)       | 6 (3)       | 7 (3)      | 7 (2)      |
| 1-Pentene              | 2  | 21 (11)     | 15 (7)      | 23 (9)     | 16 (4)     |
| 2-Methyl-1-butene      | 3  | 8 (4)       | 9 (4)       | 15 (7)     | 11 (3)     |
| Trans-2-Pentene        | 2  | BDL         | BDL         | 3 (1)      | BDL        |
| Cis-2-pentene          | 1  | 7 (3)       | 5 (2)       | 10 (8)     | 8 (3)      |
| 2-Methyl-2-butene      | 2  | 7 (2)       | 6 (2)       | 10 (8)     | 9 (3)      |
| Isoprene               | 6  | 1212 (1981) | 2080 (1777) | 2091 (944) | 1752 (734) |
| $\alpha$ -pinene       | 6  | 9 (8)       | 16 (10)     | 29 (33)    | 23 (10)    |
| $\beta$ -pinene        | 6  | 16 (14)     | 11 (8)      | 18 (17)    | 17 (8)     |
| <b>Alkynes</b>         |    |             |             |            |            |
| Acetylene              | 64 | 1085 (499)  | 868 (191)   | 1075 (255) | 1092 (237) |
| <b>Aromatics</b>       |    |             |             |            |            |
| Benzene                | 15 | 325 (135)   | 282 (65)    | 322 (71)   | 249 (51)   |
| Toluene                | 9  | 1466 (1065) | 742 (770)   | 1108 (716) | 1415 (837) |
| Ethylbenzene           | 9  | 295 (304)   | 89 (95)     | 141 (80)   | 199 (94)   |
| m/p-Xylene             | 15 | 605 (552)   | 311 (427)   | 468 (322)  | 1151 (707) |
| Styrene                | 30 | 72 (36)     | 62 (14)     | 128 (78)   | 56 (11)    |
| o-Xylene               | 7  | 264 (254)   | 114 (137)   | 172 (110)  | 239 (118)  |
| Isopropylbenzene       | 1  | 17 (16)     | 6 (4)       | 10 (4)     | 7 (3)      |
| n-Propylbenzene        | 1  | 24 (21)     | 8 (5)       | 9 (5)      | 14 (5)     |
| m-Ethyltoluene         | 4  | 31 (27)     | 21 (11)     | 23 (13)    | 26 (12)    |
| p-Ethyltoluene         | 1  | 27 (22)     | 12 (12)     | 44 (31)    | 10 (8)     |
| 1,3,5-Trimethylbenzene | 2  | 27 (35)     | 15 (12)     | 16 (9)     | 19 (7)     |
| o-Ethyltoluene         | 1  | 73 (75)     | 9 (7)       | 10 (6)     | 40 (23)    |
| 1,2,4-Trimethylbenzene | 6  | 95 (98)     | 37 (29)     | 49 (29)    | 48 (22)    |
| 1,2,3-Trimethylbenzene | 2  | 22 (22)     | 10 (8)      | 17 (10)    | 15 (6)     |
| m-Diethylbenzene       | 6  | BDL         | BDL         | BDL        | BDL        |
| p-Diethylbenzene       | 6  | 11 (4)      | BDL         | 20 (8)     | 8 (1)      |
| o-Diethylbenzene       | 6  | 13 (7)      | BDL         | BDL        | 11 (3)     |
| <b>Carbonyls</b>       |    |             |             |            |            |
| Formaldehyde           | 19 | 9479 (2555) | 5464 (813)  | 7361 (571) | 7806 (762) |
| Acetaldehyde           | 34 | 3029 (1162) | 1131 (466)  | 1556 (182) | 2104 (534) |
| Acetone                | 21 | 4944 (572)  | 3090 (381)  | 4504 (328) | 4103 (342) |
| Propionaldehyde        | 27 | 325 (152)   | 74 (45)     | 99 (25)    | 197 (62)   |
| 2-Butanone             | 25 | 688 (197)   | 298 (82)    | 432 (51)   | 492 (87)   |
| Benzaldehyde           | 22 | 158 (70)    | 58 (41)     | 81 (20)    | 83 (34)    |
| Glyoxal                | 14 | 345 (122)   | 162 (40)    | 341 (75)   | 254 (55)   |
| Methylglyoxal          | 15 | 1193 (308)  | 754 (127)   | 1214 (172) | 982 (94)   |

<sup>a</sup>MDL: method detection limit, pptv. <sup>b</sup>BDL: below the detection limit.

**Table S2.** Top 10 VOC species with RIR values.

| Rank | August 29     | August 30      | August 31        | September 1      | September 2      | September 3      |
|------|---------------|----------------|------------------|------------------|------------------|------------------|
| 1    | Formaldehyde  | Isoprene       | Isoprene         | Isoprene         | Isoprene         | Isoprene         |
| 2    | Methylglyoxal | Formaldehyde   | Formaldehyde     | Formaldehyde     | Formaldehyde     | Formaldehyde     |
| 3    | Acetaldehyde  | Methylglyoxal  | Methylglyoxal    | Methylglyoxal    | Methylglyoxal    | Methylglyoxal    |
| 4    | m/p-Xylene    | Acetaldehyde   | Acetaldehyde     | Acetaldehyde     | $\alpha$ -pinene | $\alpha$ -pinene |
| 5    | Isoprene      | m/p-Xylene     | m/p-Xylene       | $\alpha$ -pinene | Acetaldehyde     | Acetaldehyde     |
| 6    | n-Butane      | Trans-2-butene | $\alpha$ -pinene | m/p-Xylene       | Trans-2-butene   | Trans-2-butene   |
| 7    | Toluene       | o-Xylene       | Trans-2-butene   | Trans-2-butene   | Cis-2-butene     | Cis-2-butene     |
| 8    | o-Xylene      | n-Butane       | Propene          | Propene          | n-Butane         | n-Butane         |
| 9    | Cis-2-butene  | Toluene        | Toluene          | n-Butane         | Isobutane        | Propene          |
| 10   | TM124B        | Cis-2-butene   | n-Butane         | Cis-2-butene     | Propene          | Isobutane        |

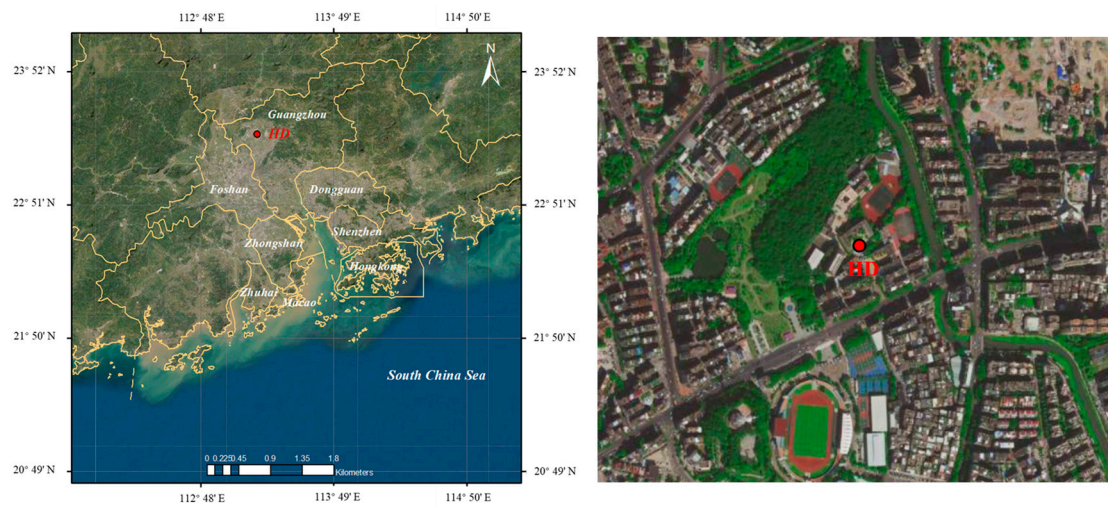

**Figure S1.** Location of the HD sampling site.

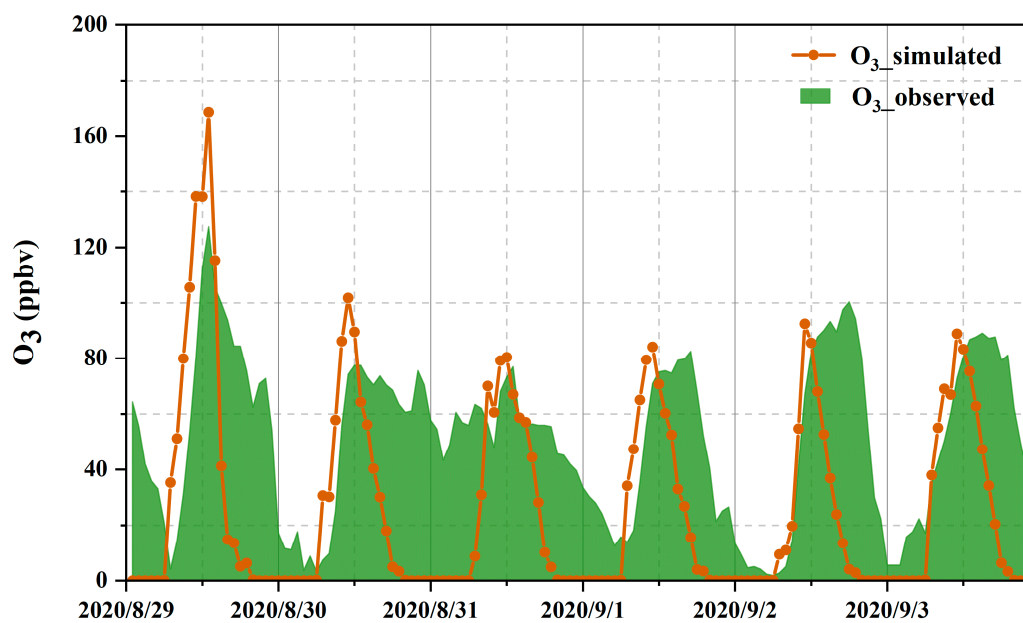

**Figure S2.** Simulated and observed O<sub>3</sub> during O<sub>3</sub> pollution (O<sub>3</sub> episode days) and clean (non-O<sub>3</sub> episode days) days.

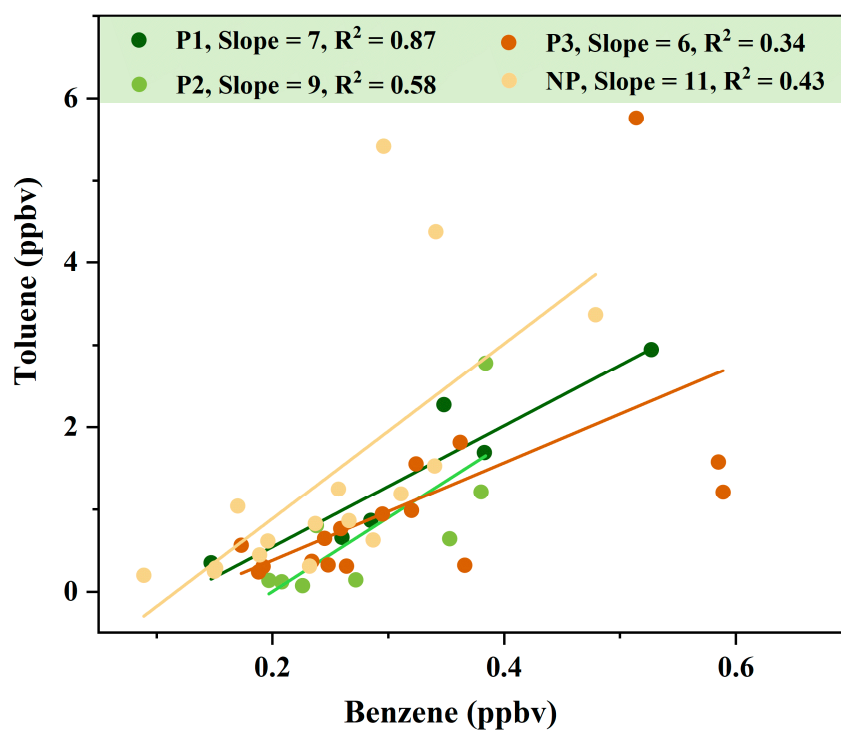

**Figure S3.** Scatter plots of toluene to benzene during four periods.

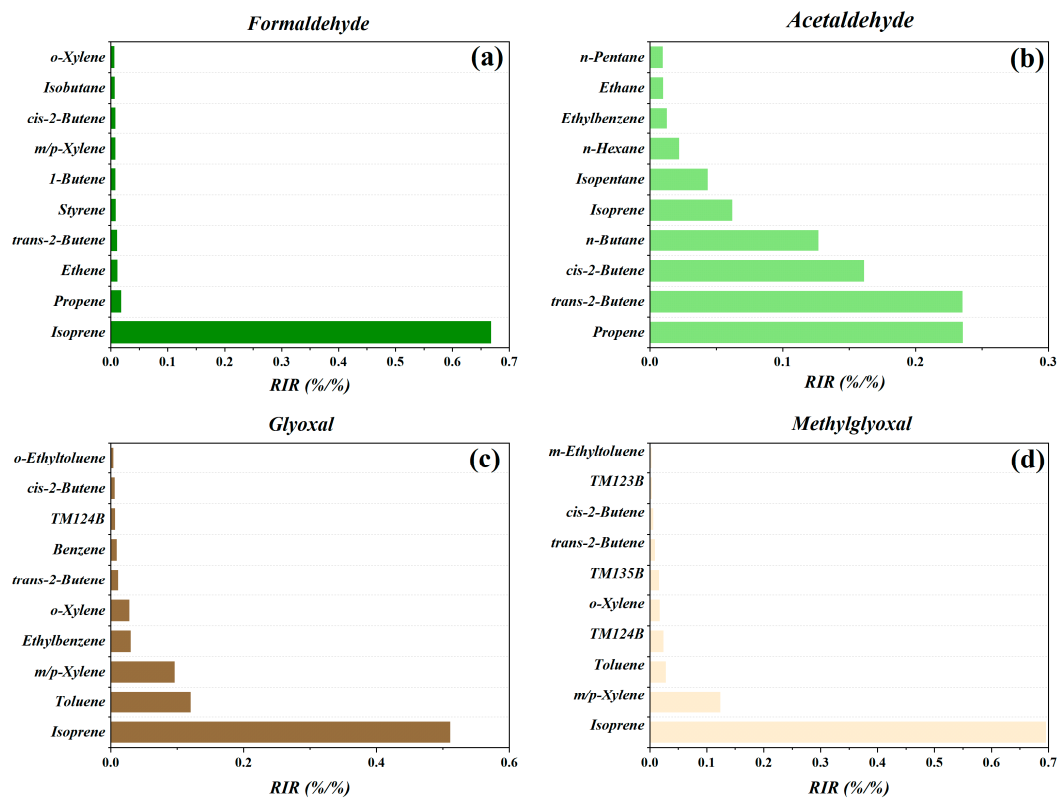

**Figure S4.** Average RIR values of the top 10 VOC species for (a) formaldehyde, (b) acetaldehyde, (c) glyoxal and (d) methylglyoxal during the whole campaign (TM123B: 1,2,3-trimethylbenzene; TM124B: 1,2,4-trimethylbenzene; TM135B: 1,3,5-trimethylbenzene).
